- Handbook to Latin American Studies*, 1947, No. 13. Prepared by the Hispanic Foundation of the Library of Congress, edited by F. Aguilera. Harvard University Press (London: Geoffrey Cumberlege), 1951, pp. x + 239, £1 5s.
- T. Heywood, *How Smoke gets into the Air*. Published by the author, The Fortune Press, 1951, pp. 25, 5s.
- The I Ching* or *Book of Chances*. 2 vols. The Richard Wilhelm translation rendered into English by Cary F. Baynes. London, Routledge & Kegan Paul Ltd., 1951, pp. xlii + 395 and 371, £2 2s.
- Magus, *Il Grande Vangelo*. Milan, Libreria, Editrice Univeraitaria, 1951, pp. 195.
- R. Morris, *The Quality of Learning*. London, Methuen & Co., Ltd., 1951, pp. vi + 107, 7s 6d.
- J. Seyppel, *Dekadenz oder Fortschritt*. Schlehndorf Obb., Bronnen-Verlag, 1951, pp. 64.
- T. L. Vaswani, *A Prophet of the People*. Poona, Gita Publishing House, 1951, pp. 74, 4s.
- T. L. Vaswani, *An Interpretation* by Dhan Raj. Hyderabad-Sind, Dhan Raj, 1936, pp. 39.
- T. L. Vaswani, *Gita: Meditations*. Vol. I. Poona, Gita Publishing House, 1951, pp. 138, 10s. 6d.
- A. Wenzl, *Unsterblichkeit*. Bern, A. Francke Ap. Verlag, 1951, pp. 213, S. Fr. 7.80.
- Sir E. Whittaker, *History of the Theories of Aether and Electricity*. London, Thomas Nelson & Sons Ltd., 1951, pp. xiii + 434, £1 12s. 6d.
- J. Z. Young, *Doubt and Certainty in Science* (B.B.C. Reith Lectures, 1950). Oxford, at the Clarendon Press (Geoffrey Cumberlege), 1951, pp. vi + 168, 7s. 6d.

### A PROBLEM OF LEWIS CARROLL

*Mind*, July, 1951

#### CORRIGENDA

- Page 394. Premise no. 10. For Q read  $\bar{Q}$ .  
Premises no. 11 and 13. For S read  $\bar{S}$ .
- Page 395. There should be a bar over every S, O and V, and over each Q up to and including line 18.
- Page 395. Line 30. Omit P.
- Page 396. Line 2. For S read  $\bar{S}$ .  
Line 8. For A read  $\bar{A}$ .

L. J. RUSSELL.
